# Supplementary material
Source: PubMed Central journal article supplement (PMC4524159)
Supplement: AEM.00043-15_zam999116333so1.pdf [file AEM.00043-15_zam999116333so1.pdf]

## Supplemental material

1  
2  
3  
4  
5  
6  
7  
8  
9  
10  
11  
12  
13  
14  
15  
16  
17  
18  
19  
20  
21  
22  
23

### A. Supplemental Materials and Methods

### B. Supplemental Figures

**FIG S1** The well system for *in situ* bioremediation of U(VI) with EVO, showing groundwater flow direction and distribution of eight wells for this study.

**FIG S2** Groundwater concentrations of acetate, U(VI), nitrate, sulfate, Mn(II), and Fe(II) in the eight wells before and after EVO amendment.

**FIG S3** Hierarchical cluster analysis of all functional genes detected in the eight wells.

**FIG S4** Average relative abundance of (a) representative genes involved in the degradation of organic carbon compounds and (b) genes for CO<sub>2</sub> fixation in seven downgradient wells (W1-W7) after EVO amendment.

**FIG S5** Enrichment of key genes involved in acetogenesis, methanogenesis, and methane oxidation in the seven downgradient wells 17 days after EVO amendment.

**FIG S6** Changes in the relative abundance of genes involved in N cycling in the seven downgradient wells after EVO amendment.

**FIG S7** Enrichment of key genes involved in dissimilatory nitrate reduction in the seven downgradient wells 17 days after EVO amendment.

**FIG S8** Enrichment of *dsrAB* genes encoding dissimilatory sulfite reductase in the seven downgradient wells after EVO amendment, showing EVO stimulation of *Desulfovibrio* and *Desulfotomaculum* species.

**FIG S9** Changes of major cytochrome-containing populations in the seven downgradient wells after EVO amendment.

24 **FIG S10** Changes in the composition and structure of cytochrome-containing communities in the  
25 seven downgradient wells after EVO amendment.

26 **FIG S11** Enrichment of hydrogenase genes in the seven downgradient wells 17 days after EVO  
27 amendment.

28 **FIG S12** Enrichment of metal resistance (a and c) and organic contaminant degradation (b and d)  
29 genes in the seven downgradient wells (W1-W7) at 17 days after EVO amendment.

### 30 **C. Supplemental Table**

31 **Table S1** Significance of the effects of EVO amendment on community functional structure and  
32 concentrations of acetate and electron acceptors.

### 33 **D. Supplemental References**

34

### 35 **A. Supplemental Materials and Methods**

36 **Site description.** This study was performed in Area 2 of the US Department of Energy's Oak  
37 Ridge Integrated Field Research Challenge (ORIFRC) site, TN. The test plot is located about 300  
38 m from the former S-3 waste ponds (the source of contamination). Contaminants in the  
39 groundwater (pH 6.6-6.9) were transported through the primary contaminant path and are  
40 primarily U (3.8-7.1  $\mu\text{M}$ ), sulfate (1.0-1.2 mM) and nitrate (0.2-1.5 mM) with up to  $\geq 300$  mg/kg  
41 U in soil-saprolite (14). Dissolved oxygen was near zero although oxygen can infiltrate into the  
42 upper vadose zone from the atmosphere. The groundwater flows from an upgradient zone across  
43 a control well (W8), three injection wells, and then passes through the downgradient zone  
44 installed with seven monitoring wells (W1-W7) (see [Fig. S1 in the supplemental material](#)). With  
45 a high hydraulic conductivity ( $1.3\text{-}3.8 \times 10^{-2}$  cm/sec) and a mean hydraulic gradient of 0.03, the  
46 groundwater took 10 hours to flow through the test plot. The groundwater flow pattern was

47 characterized by injecting a potassium bromide solution (450 mg/L, 3,400 L) into the three  
48 injection wells over a 1.5h period two months prior to the test. Peak bromide concentrations were  
49 then mapped as an indicator of hydraulic connection among the wells (see [Fig. S1 in the](#)  
50 [supplemental material](#)) (7). The contaminated zone is an unlined aquifer ~8.0 m below ground  
51 (bg). The water table, which varies with rain fall events, is ~4 m bg. Overlying the bedrock are (a)  
52 an intact weathered shale saprolite, 6–8 m bg, that has unconsolidated characteristics that retain  
53 much of the bedding and fracture structure of the parent rock, and (b) a zone of fill with a  
54 mixture of disturbed saprolite and gravel, 0–6.0 m bg.

55 **EVO amendment and sampling.** EVO was injected into the unconsolidated zone (gravelly  
56 fill above the intact saprolite). The composition of EVO (SRS<sup>TM</sup>, Terra Systems, Wilmington,  
57 DE) was 60% (w/w) vegetable oil, 0.3% yeast extract, 0.05% (NH<sub>4</sub>)<sub>3</sub>PO<sub>4</sub>, 6% food grade  
58 surfactants (mainly arachidic acid), and reminder was water. An EVO emulsion (680 L SRS<sup>TM</sup>  
59 diluted to 3,400 L with site groundwater) was evenly injected into three injection wells over a 2-  
60 h time period on February 9, 2009. EVO was injected into the unconsolidated zone (gravel fill  
61 above the intact saprolite; beneath the water table) using pumps. After injection, groundwater  
62 samples were collected from W1-W8 before injection and 4, 17, 31, 80, 140, and 269 days after  
63 the injection by pumping. Before sampling, the wells were purged by pumping ~ 3 times the well  
64 volume of groundwater into the well to wash out accumulated dead water in the wells. For  
65 microbial community analysis, groundwater was filtered on site with sterile 8-µm filters to  
66 remove large particles, followed by filtering with 0.2-µm filters to collect biomass. The filters  
67 were immediately frozen, shipped on dry ice to the laboratory, and stored at -80 °C until DNA  
68 extraction.

69        **Groundwater geochemical analysis.** Groundwater samples for metal analysis (10 mL)  
70 were filtered via 0.3 µm filter and acidified with 0.05 ml of concentrated nitric acids, and then  
71 stored at 4°C until analysis. The source and quality of other chemicals used and analytical  
72 methods are described in detail previously (17, 18). U(VI) was measured using a kinetic  
73 phosphorescence KPA-11 analyzer for U analysis (Chemchek Instruments, Richland, WA). The  
74 speciation of U in sediments was determined by XANES and EXAFS as described previously  
75 (10). Anions (acetate,  $\text{NO}_3^-$ ,  $\text{Cl}^-$ , and  $\text{SO}_4^{2-}$ ) were analyzed with an ion chromatograph equipped  
76 with an IonPac AS-14 analytical column and an AG-14 guard column (Dionex DX-120,  
77 Sunnyvale, CA). Cations (Al, Ca, Fe, Mn, Mg, U, K, etc) were determined using an inductively  
78 coupled plasma mass spectrometer (ICPMS) (Perkin Elmer ELAN 6100). Aqueous Fe(II), total  
79 Fe, sulfide and COD were measured colorimetrically using a HACH DR 2000 spectrophotometer  
80 (Hach Chemical, Loveland, CO). Methane was measured by a TCD gas chromatograph as  
81 described by Spalding and Watson (2006, 2008). The EVO or oil concentration in groundwater  
82 was indirectly analyzed using volatile solid (VS), which was determined by weight loss on  
83 ignition for 1 hour at 550 °C (4). The pH, dissolved oxygen (DO), conductivity, temperature,  
84  $\text{HCO}_3^-$ , sulfide and Fe(II) of groundwater samples were determined in the wells or immediately  
85 in an on-site trailer laboratory at the Oak Ridge site.

86        **GeoChip analysis.** Groundwater DNA was extracted from the filters by a freeze-grinding  
87 mechanical lysis method (20). DNA quality was assessed by absorbance ratios (260/280 and  
88 260/230 nm) using a NanoDrop ND-1000 Spectrophotometer (NanoDrop Technologies Inc.,  
89 Wilmington, DE). The final DNA concentrations were quantified by the PicoGreen method (1)  
90 using a FLUOstar Optima (BMG Labtech, Jena, Germany) with a Quant-It PicoGreen kit  
91 (Invitrogen, Carlsbad, CA).

92 A comprehensive functional gene array, GeoChip 3.0 was used to analyze the functional  
93 composition, structure and dynamics of all 56 microbial communities. GeoChip 3.0 contains >  
94 28,000 probes covering approximately 57,000 gene variants from 292 functional gene families  
95 involved in carbon (C), nitrogen (N), phosphorus (P) and sulfur (S) cycling, energy metabolism,  
96 antibiotic resistance, metal resistance and organic contaminant degradation. It also has other  
97 distinct features, such as a common oligonucleotide as the universal standard for data  
98 normalization and comparison (12).

99 *DNA amplification and labeling.* In order to produce consistent hybridizations from all  
100 samples, a whole community genome amplification was used with 20 ng DNA as the template  
101 using the TempliPhi Kit (GE Healthcare, Piscataway, NJ) following the manufacturer's  
102 instructions (16). Also, single-strand binding protein (267 ng  $\mu\text{L}^{-1}$ ) and spermidine (0.1 mM)  
103 were added to the reaction mix to improve the amplification efficiency. The reactions were  
104 incubated at 30°C for 4 hours and stopped by heating the mixtures at 65°C for 10 min. After  
105 amplification, the generated DNA (~3.0  $\mu\text{g}$ ) was labeled with the fluorescent dye Cy-5 using  
106 random priming method as follows. First, the amplified products were mixed with 20  $\mu\text{L}$  random  
107 primers, denatured at 99.9 °C for 5 min, and then immediately chilled on ice. Following  
108 denaturation, a labeling master mix containing 2.5  $\mu\text{L}$  dNTP (5 mM dAGC-TP, 2.5 mM dTTP),  
109 1  $\mu\text{L}$  Cy-5 dUTP (Amersham, Piscataway, NJ), 80 U of the large Klenow fragment (Invitrogen,  
110 Carlsbad, CA), and 2.5  $\mu\text{L}$  water was added, incubated at 37 °C for 5 hours, and heated at  
111 95°C for 3 min. Labeled DNA was purified using QIA quick purification kit (Qiagen, Valencia,  
112 CA) according to the manufacturer's instructions, measured on a NanoDrop ND-1000  
113 spectrophotometer (NanoDrop Technologies Inc., Wilmington, DE), and then dried down in a  
114 SpeedVac (ThermoSavant, Milford, MA) at 45°C for 45 min.

115 *GeoChip hybridization and image analysis.* The labeled DNA was re-suspended in 56  $\mu$ l  
116 hybridization solution containing 45% formamide,  $3 \times$  SSC, 10.0  $\mu$ g of unlabeled herring sperm  
117 DNA (Promega, Madison, WI), and 0.1% SDS, and the mix was denatured at 95°C for 5 min and  
118 kept at 50°C until it was deposited directly onto a microarray. Hybridizations were performed on  
119 a MAUI Hybridization System (BioMicro Systems, Salt Lake City, UT) at 42°C for 12 h with  
120 mixing. After washing and drying, the microarray was scanned by a ScanArray Express  
121 Microarray Scanner (Perkin Elmer, Boston, MA) at 633 nm using a laser power of 90% and a  
122 photomultiplier tube (PMT) gain of 75%. The ImaGene version 6.0 (Biodiscovery, El Segundo,  
123 CA) was then used to determine the intensity of each spot, and identify poor-quality spots.

124 Raw data from ImaGene were submitted to Microarray Data Manager in our website  
125 (<http://ieg.ou.edu/microarray/>) and analyzed using the data analysis pipeline with the following  
126 major steps: (i) The spots flagged as 1 or 3 by Imagen and with a signal to noise ratio (SNR)  
127 less than 2.0 (9) were removed as poor-quality spots; (ii) After removing the bad spots,  
128 normalized intensity of each spot was calculated by dividing the signal intensity of each spot by  
129 the mean intensity of the microarray; (iii) If any of replicates had (signal–mean) more than two  
130 times the standard deviation, this replicate was moved as an outlier. This process continued until  
131 no such replicates were identified; (iv) At least 0.34 time of the final positive spots (probes), or a  
132 minimum of two spots was required for each gene; and (v) If a probe appeared in one sample  
133 among the total of 7 samples for each time point, it was removed for data reliability .

134 **Statistical analysis.** Preprocessed GeoChip data and geochemical data were further analyzed  
135 using various statistical methods as described elsewhere (8, 11, 13, 15, 19).

136 *Hierarchical clustering analysis.* Hierarchical clustering for microbial community structure  
137 and composition was performed with CLUSTER 3.0 using uncentered correlations and the

138 complete average linkage for both genes and samples, and trees were visualized in TREEVIEW  
139 (6). The effects of EVO amendment on relative abundance of various functional genes were  
140 analyzed by standard t-test. The relative abundance was calculated by dividing the total signal  
141 intensity of detected individual gene sequences for each gene or gene group by the total signal  
142 intensity of all genes detected on the GeoChip.

143 *Multivariate and direct gradient analysis.* In this study, three different non-parametric  
144 analyses for multivariate data were used to examine whether EVO amendment has significant  
145 effects on groundwater microbial communities: analysis of similarities (ANOSIM) (5), non-  
146 parametric multivariate analysis of variance (Adonis) using distance matrices (2), and multi-  
147 response permutation procedure (MRPP). We used Jaccard (non-quantitate) and Bray-Curtis  
148 (quantitate) similarity indexes to calculate distance matrix for ANOSIM, Adonis and MRPP  
149 analyses. All three methods are based on dissimilarities among samples and their rank order in  
150 different ways to calculate test statistics, and the Monte Carlo permutation is used to test the  
151 significance of statistics.

152 *Mantel test.* To elucidate the inter-relationships between groundwater geochemical variables  
153 and the abundance of functional genes of microbial community detected by GeoChip, the Mantel  
154 test was employed. Mantel test is an appropriate statistic method to measure the correlation  
155 between dissimilarity matrices and the significance of the statistics evaluated by permuting the  
156 matrixes (3). The geochemical data were standardized to zero mean and unit deviation before  
157 calculation. The Bray-Curtis distance was used to construct the dissimilarity matrixes of  
158 communities and environmental variables respectively. All the analyses were performed by the  
159 vegan package in R (R Development Core Team, 2011).

160

161 **B. Supplemental Figures**

162

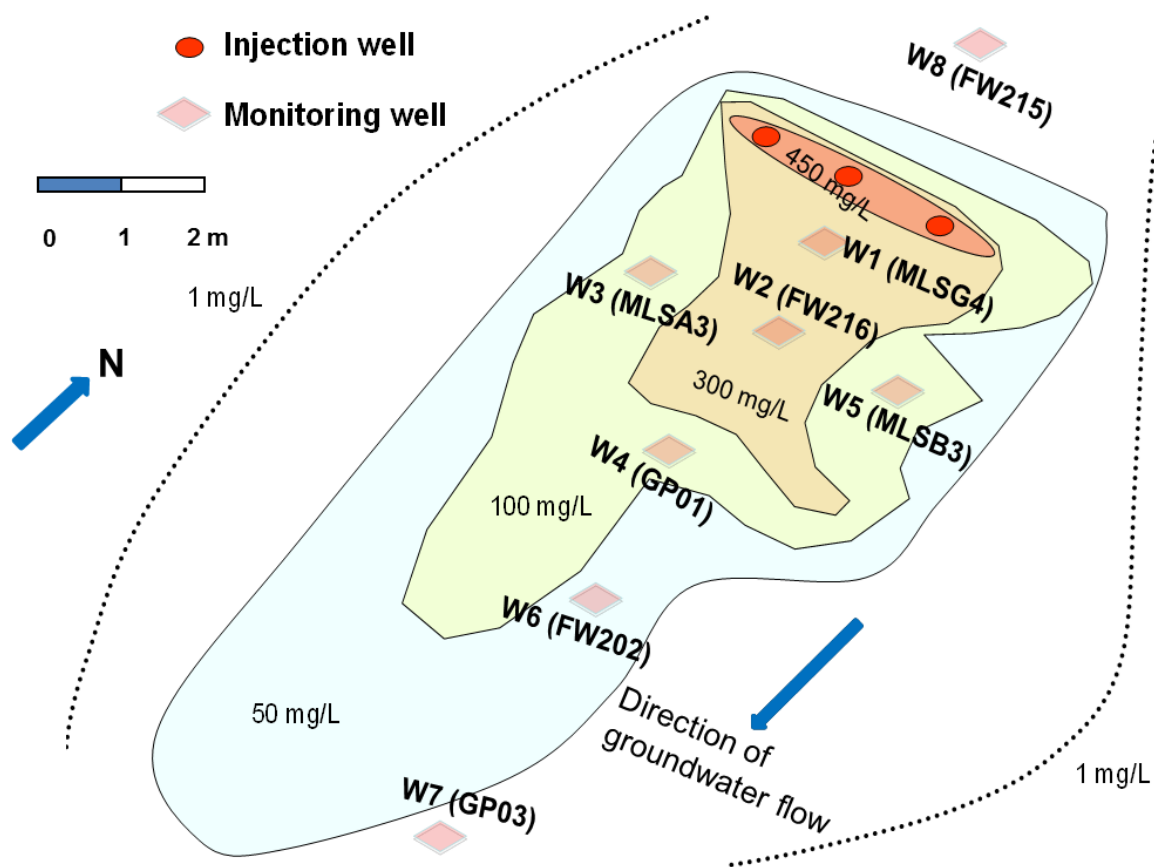

163

164 **FIG S1** The well system for *in situ* bioremediation of U(VI) with EVO amendment, showing  
165 groundwater flow direction and distribution of a upgradient control well, W8 (FW215) and seven  
166 downgradient monitoring wells, W1 (MLSG4), W2 (FW216-1), W3 (MLSA8), W4 (GP01), W5  
167 (MLSB3), W6 (FW202-2), and W7 (GP03). The peak bromide concentration distribution was  
168 drawn based on data from a previous tracer test with injection of bromide solution (450 mg/L)  
169 into the three injection wells as an indicator of hydraulic connection among the wells.

170

171

172



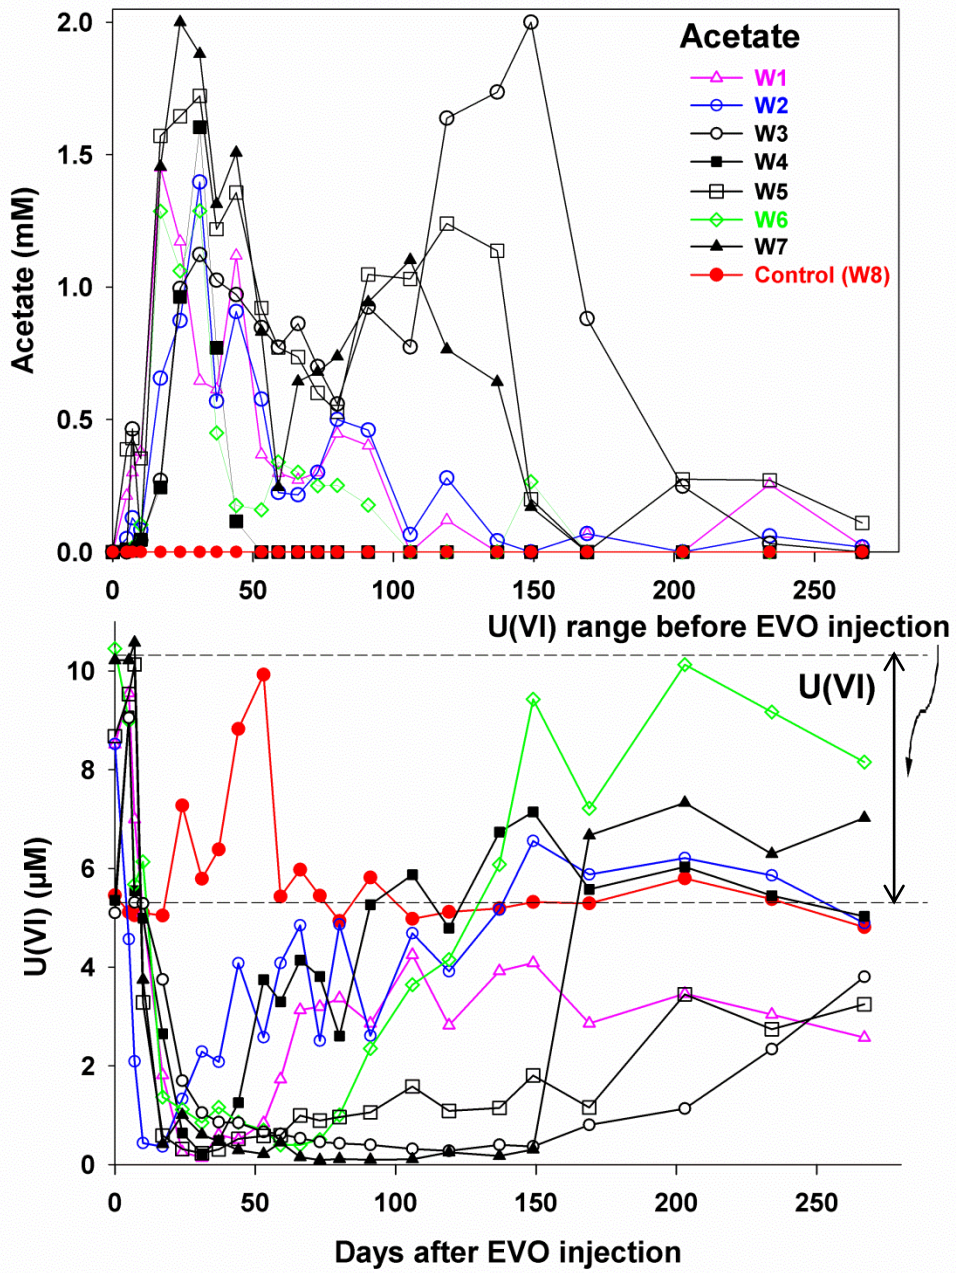

173

174

175

176

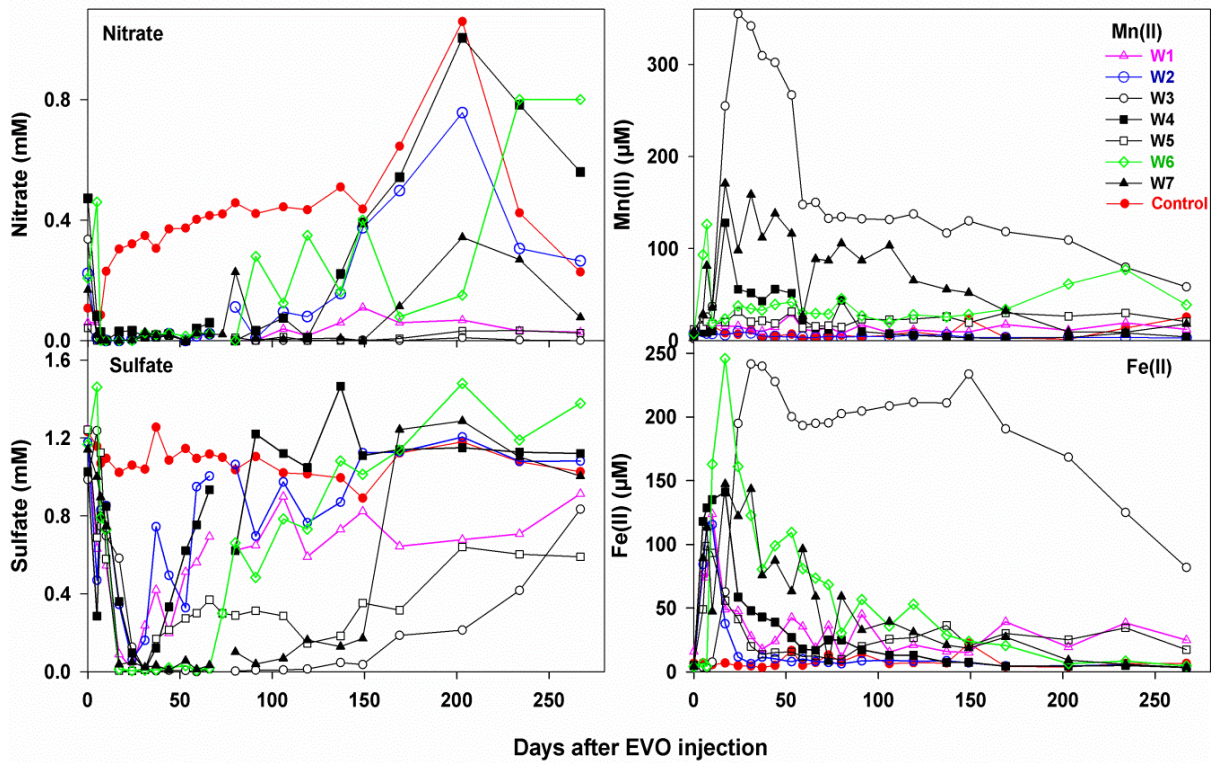

177

178 **FIG S2** Changes in groundwater concentrations of acetate, U(VI), nitrate, sulfate, Mn(II), and  
 179 Fe(II) in the eight monitoring wells (W1-W8) after EVO amendment. The U(VI) concentration  
 180 range before EVO injection is shown.

181

182

183

184

185

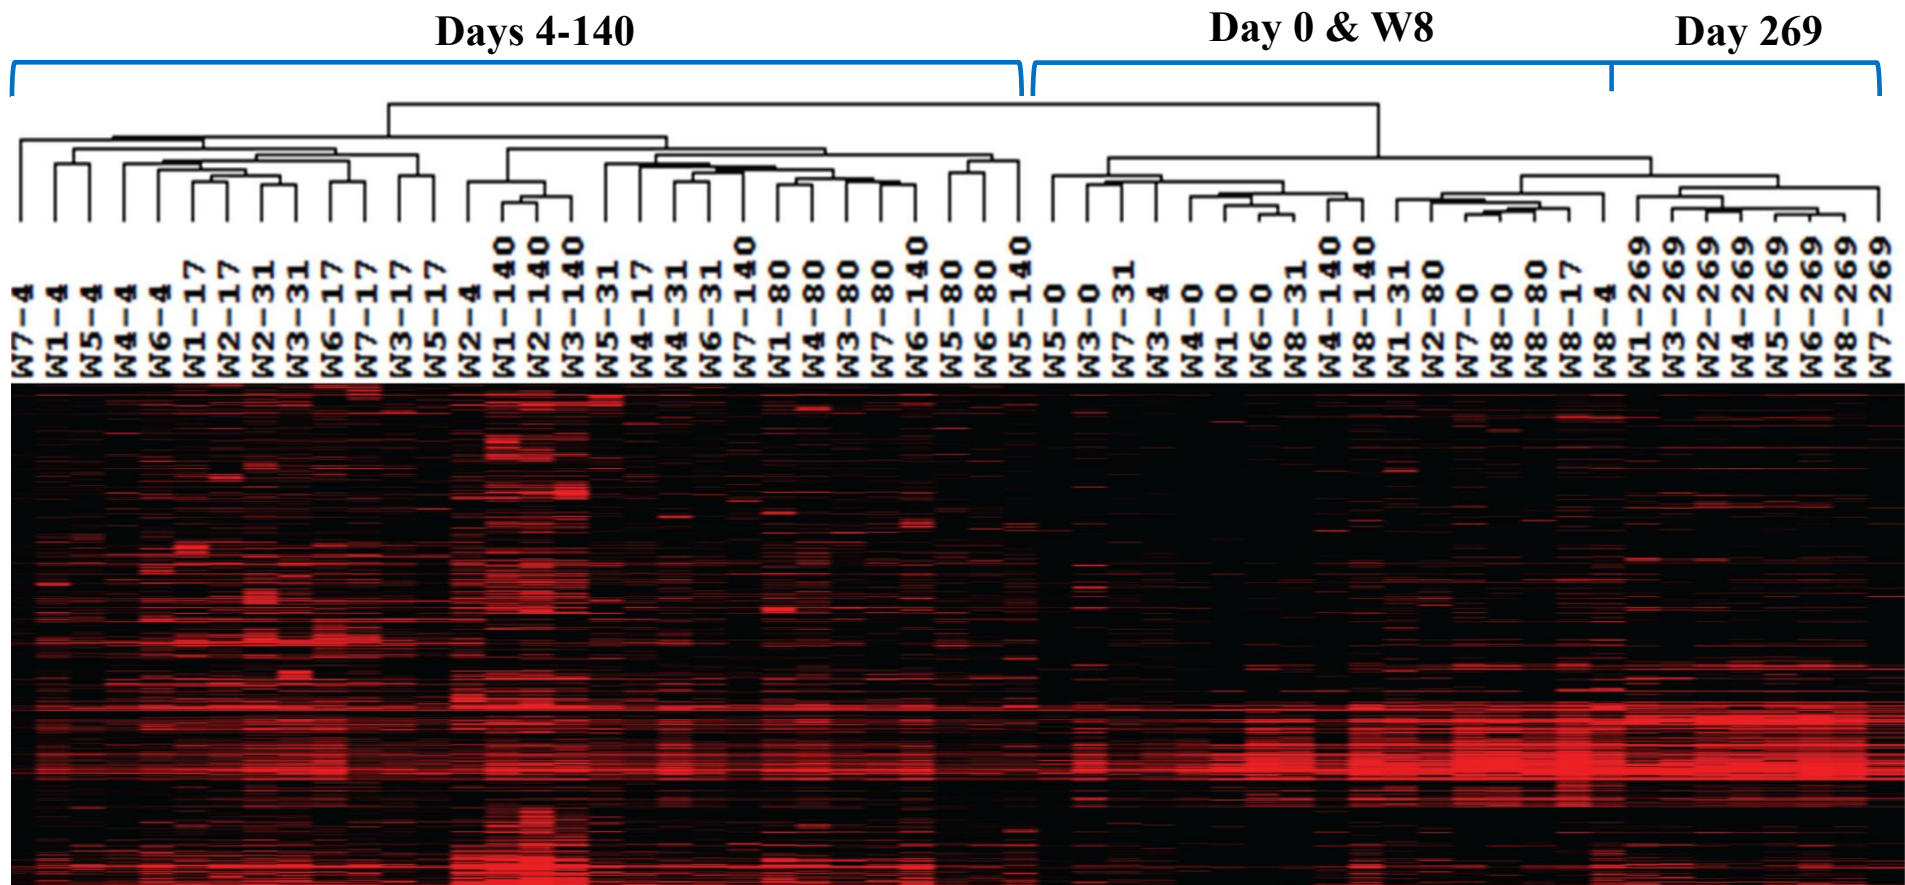

196

197 **FIG S3** Hierarchical cluster analysis of all functional genes detected in at least two out of the seven downgradient wells (W1-W7) at  
 198 each time point (0, 4, 17, 31, 80, 140, and 269 days). Genes detected in an upgradient control well (W8) at these time points were also  
 199 included. In the sample IDs, the number following dash represents days after EVO amendment, with 0 = before EVO amendment.  
 200 Results were generated in Cluster3.0 and visualized using TreeView. Black indicates signal intensities below background, while red  
 201 indicates signal intensities above background and brighter red indicates higher signal intensities. This method about heatmap  
 202 preparation and explanation also applies to supplemental material Figs S5, S7, S8, S11, and S12.

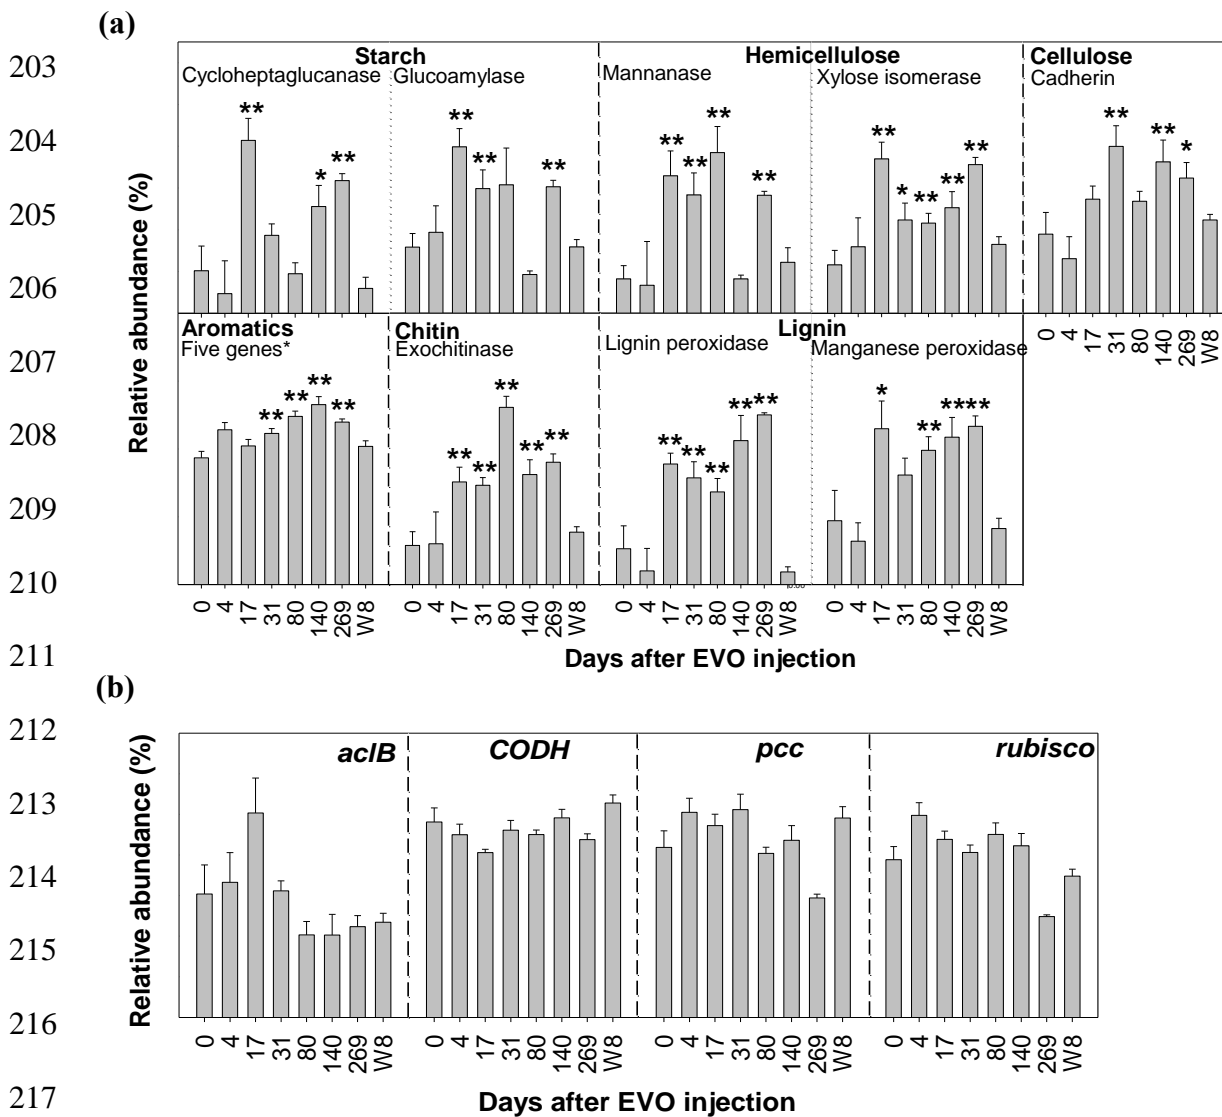

218 **FIG S4** Average relative abundance of (a) representative genes involved in the degradation of  
 219 organic carbon compounds and (b) genes for CO<sub>2</sub> fixation in seven downgradient wells (W1-W7)  
 220 after EVO amendment. Because the abundance varies for each gene depending on probes on the  
 221 array, y axis scales for gene abundance are not shown. The significance (\*\* $P < 0.05$ , \* $< 0.10$ ) was  
 222 tested between each time point and 0d using the Student's t-test. Data detected at the same time  
 223 points in a upgradient control well (W8) were also included for comparison. All data are  
 224 presented as mean  $\pm$  SE of measurements in the seven downgradient wells (W1-W7) at each time  
 225 point, and mean  $\pm$  SE of seven measurements in W8 over time. The relative abundance was

226 calculated by dividing the total signal intensity of detected individual gene sequences for each  
 227 gene or gene group by the total signal intensity of all genes detected on the GeoChip. The carbon  
 228 substrates of these genes are presented in order from labile to recalcitrant. The five stimulated  
 229 genes for aromatic degradation included isocitrate lyase, malate synthase, limonene-1,2-epoxide  
 230 hydrolase, limonene monooxygenase, and vanillin dehydrogenase. *acIB*: ATP citrate lyase;  
 231 *CODH*: carbon monoxide dehydrogenase; *pcc*: propionyl-CoA carboxylase; *rubisco*: ribulose-  
 232 1,5-bisphosphate carboxylase/oxygenase.

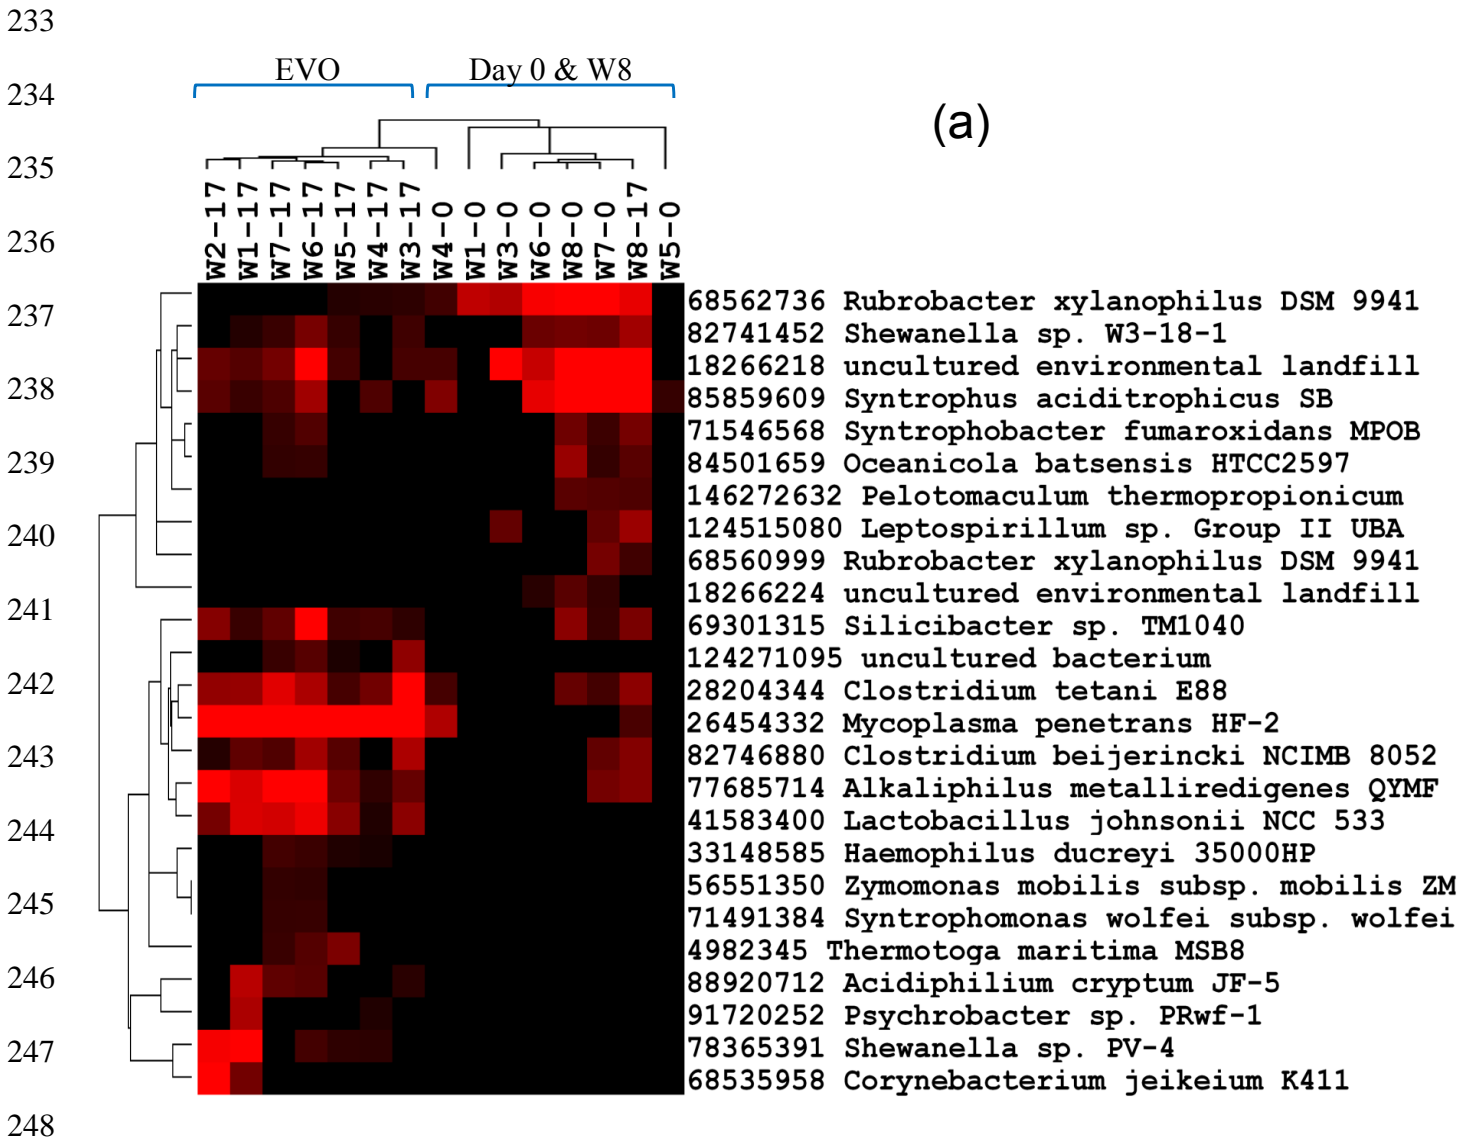

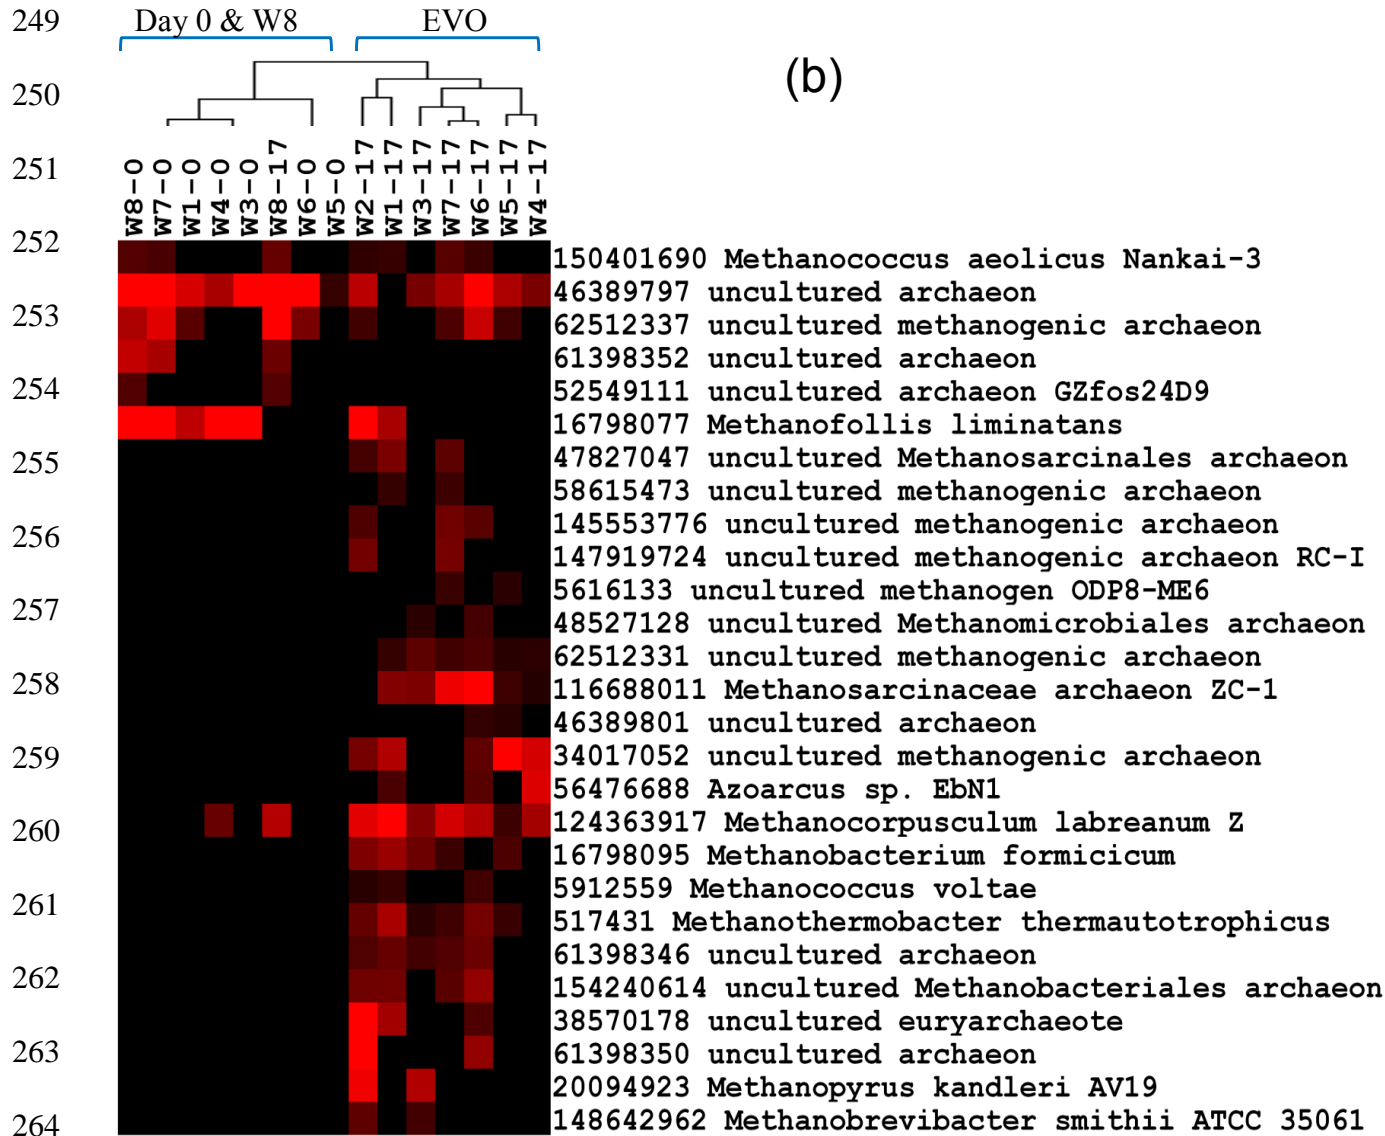

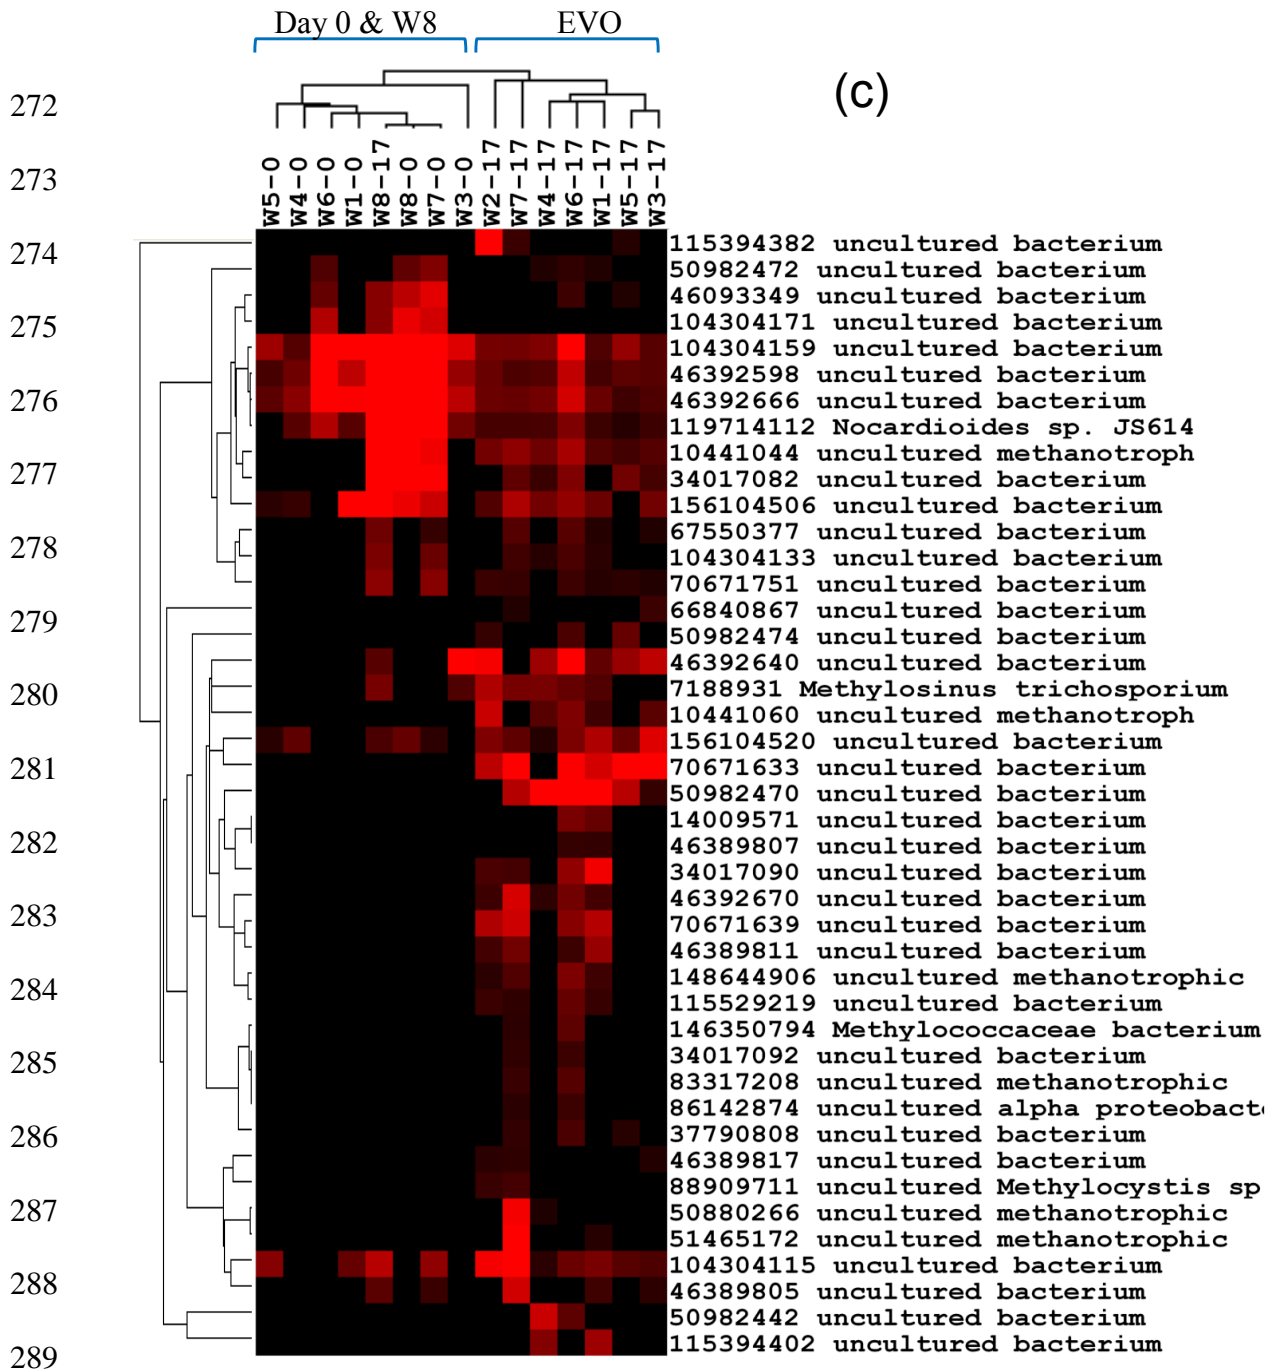

290 **FIG S5** Enrichment of key genes involved in (a) acetogenesis (*fhs*), (b) methanogenesis (*mcrA*),  
291 and (c) methane oxidation (*pmoA*) in the seven downgradient wells (W1-W7) 17 days after EVO  
292 amendment. In the sample ID, the number following dash is 0 for Day 0 samples, and is 17 for  
293 Day 17 samples. Genes detected in the control well (W8) at these time points were also included.  
294 The protein id numbers and derived microorganisms are shown.

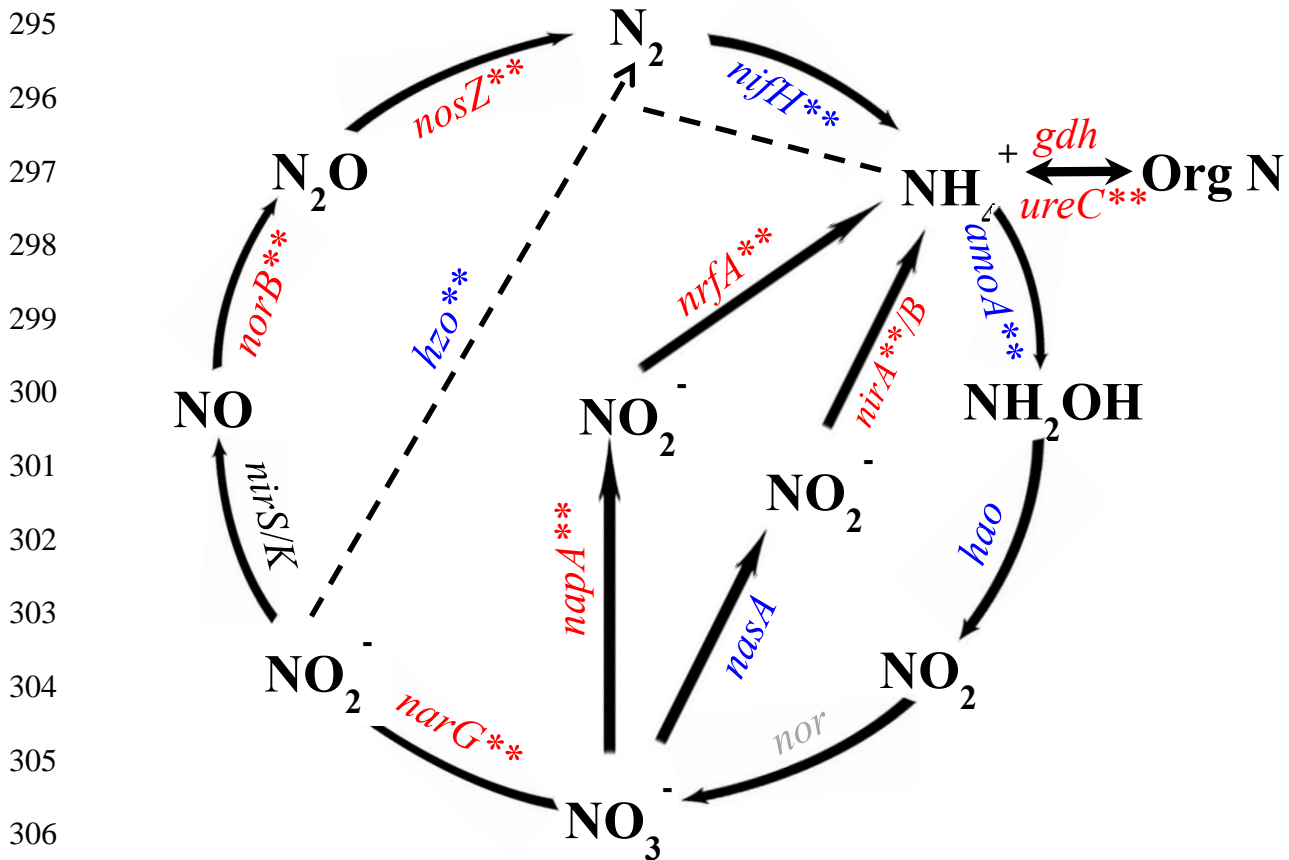

307 **FIG S6** Changes in the relative abundance of genes involved in N cycling in the seven  
 308 downgradient wells (W1-W7) after EVO amendment. For each functional gene, colors mean that  
 309 this gene had a higher (red), lower (blue), or similar (black) relative abundance than that before  
 310 EVO amendment. Gray-colored genes were not targeted by this GeoChip. All data are mean of  
 311 seven wells. The Student's t-tests were performed to determine the significance of the changes  
 312 (\*\* $P < 0.05$ ) and genes showed changes at  $\geq$ two out of the six time points were counted. The  
 313 relative abundance was calculated by dividing the total signal intensity of detected individual  
 314 gene sequences for each gene by the total signal intensity of all genes detected on the GeoChip.  
 315 More detailed temporal dynamics of these genes are shown in Fig 2. Description of the genes: (a)  
 316 *narG* encoding nitrate reductase, *nirS* and *nirK* encoding nitrite reductase, *norB* encoding nitric  
 317 oxide reductase, *nosZ* encoding nitrous oxide reductase, responsible for denitrification; (b) *napA*



318 encoding nitrate reductase, *nrfA* encoding c-type cytochrome nitrite reductase, responsible for  
319 dissimilatory nitrate reduction; (c) *nasA* encoding nitrate reductase, *nir* encoding nitrite reductase,  
320 responsible for assimilatory nitrate reduction; (d) *hzo* encoding hydrazine oxidoreductase  
321 responsible for anammox; (e) *nifH* encoding nitrogenase responsible for N<sub>2</sub> fixation; (f) *amoA*  
322 encoding ammonia monooxygenase, *hao* encoding hydroxylamine oxidoreductase, responsible  
323 for nitrification; (g) *gdh* encoding glutamate dehydrogenase, *ureC* encoding urease, responsible  
324 for ammonification.

325

326

327

328

329

330

331

332

333

334

335

336

337

338

339

340

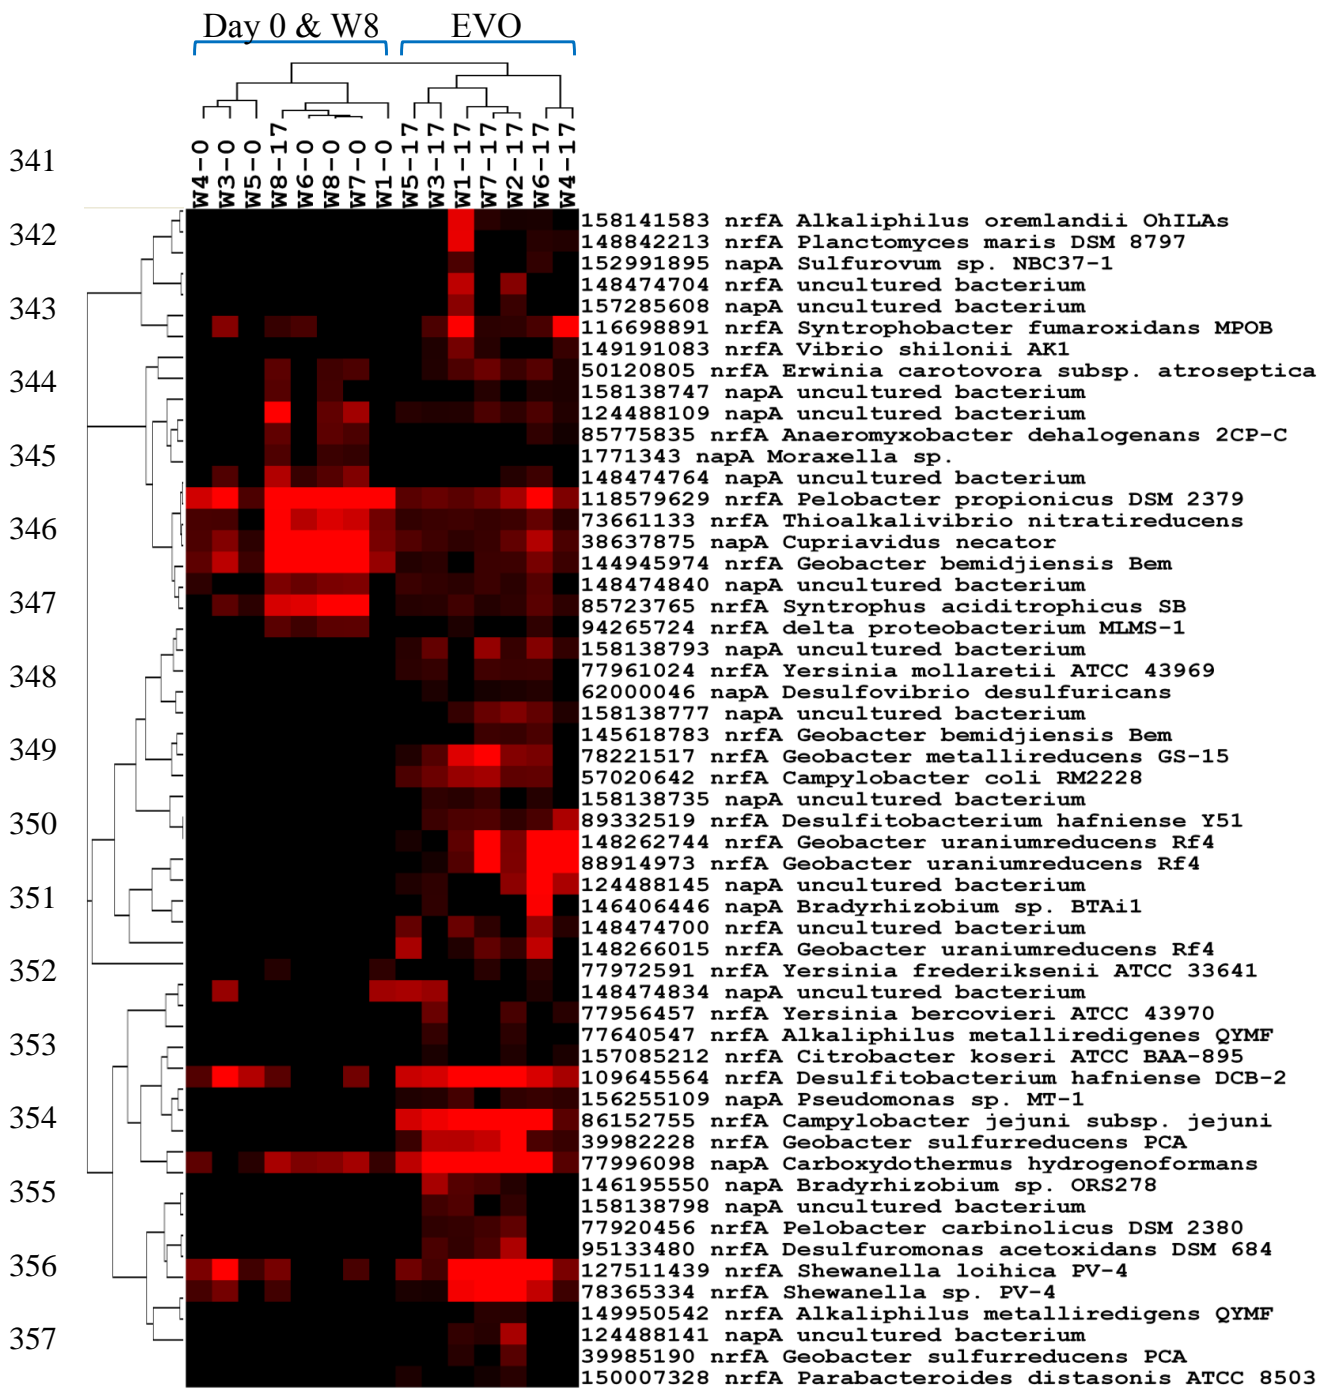

358 **FIG S7** Enrichment of key genes (*napA* encoding nitrate reductase and *nrfA* encoding c-type  
359 cytochrome nitrite reductase) involved in dissimilatory nitrate reduction in the seven  
360 downgradient wells (W1-W7) 17 days after EVO amendment. In the sample ID, the number  
361 following dash is 0 for Day 0 samples, and is 17 for Day 17 samples. Genes detected in the  
362 control well (W8) at these time points were also included. The protein id numbers and derived  
363 microorganisms are shown.

Day 0 & W8      EVO

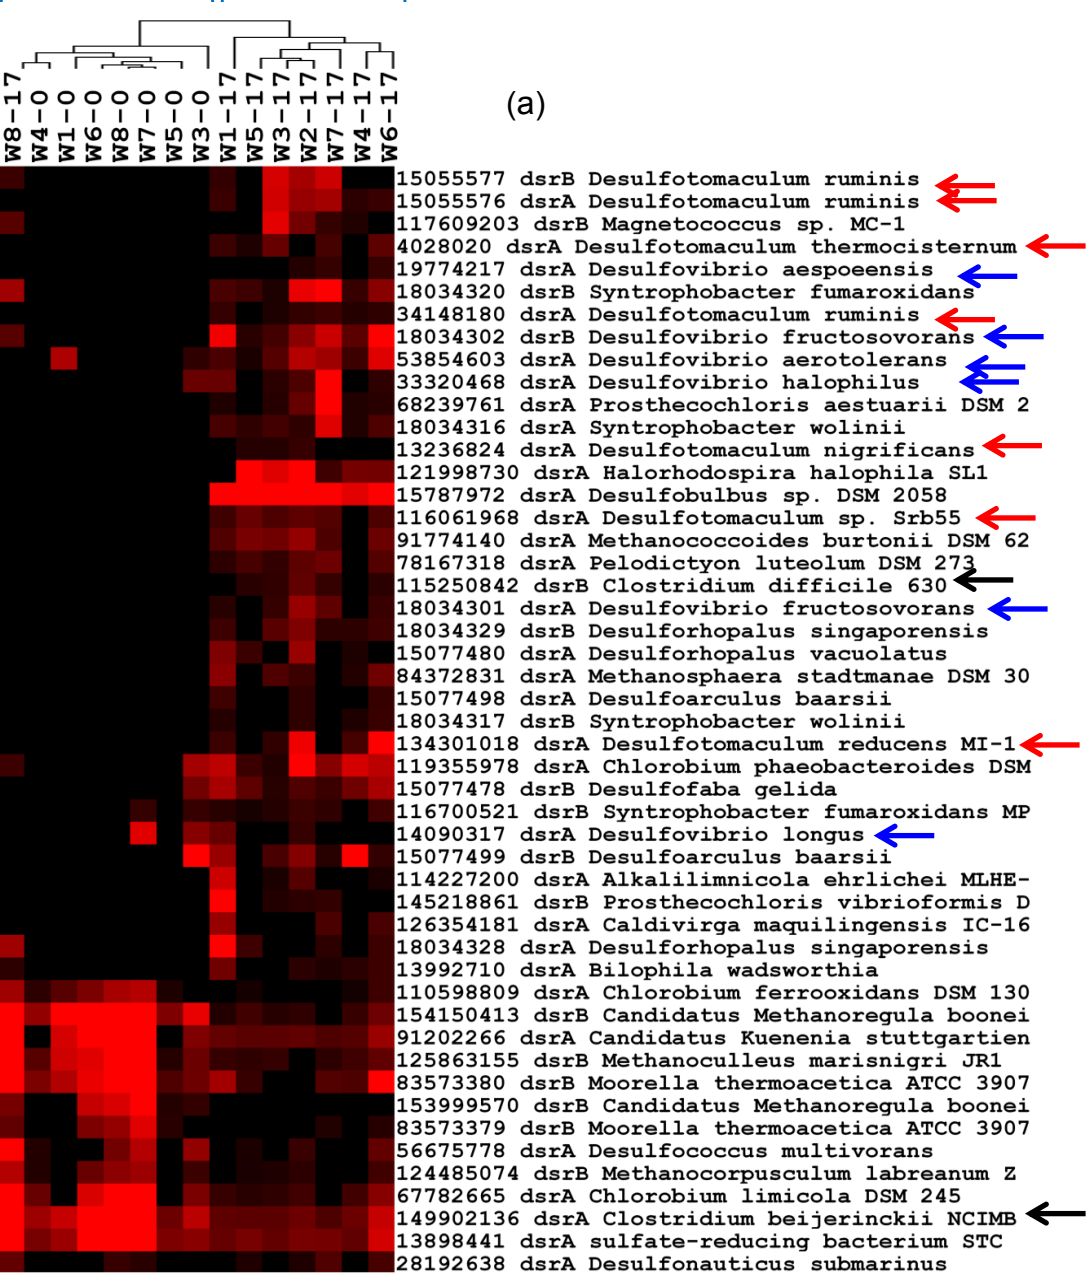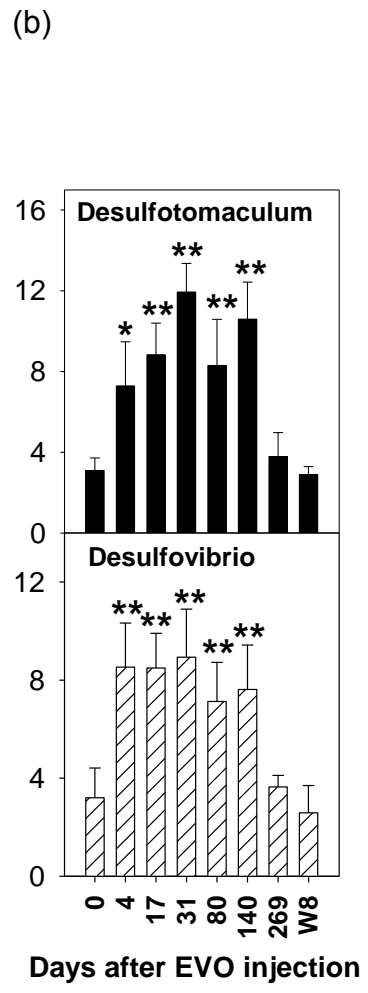

380 **FIG S8** Enrichment of *dsrAB* genes encoding dissimilatory sulfite reductase: (a) two distinct  
 381 major clusters showing *dsrAB* genes from known SRB enriched in the seven downgradient wells  
 382 (W1-W7) 17 days after EVO amendment. In the sample ID, the number following dash is 0 for  
 383 Day 0 samples, and is 17 for Day 17 samples. Data detected in the control well (W8) at these  
 384 time points were also included. The protein id numbers and derived SRB are shown. Arrows in  
 385 red indicate genes from *Desulfotomaculum*, in blue indicate genes from *Desulfovibrio*, and black  
 386 arrows indicate genes from *Clostridium*. (b) changes in average relative abundance of *dsrAB*

387 genes from two genera in in the seven downgradient wells after EVO amendment. The  
 388 significance (\*\* $P < 0.05$ , \* $< 0.10$ ) was tested between each time point and 0d using the Student's  
 389 t-test. All data are presented as mean  $\pm$  SE of measurements in the seven downgradient wells  
 390 (W1-W7) at each time point, and mean  $\pm$  SE of seven measurements in W8 over time.

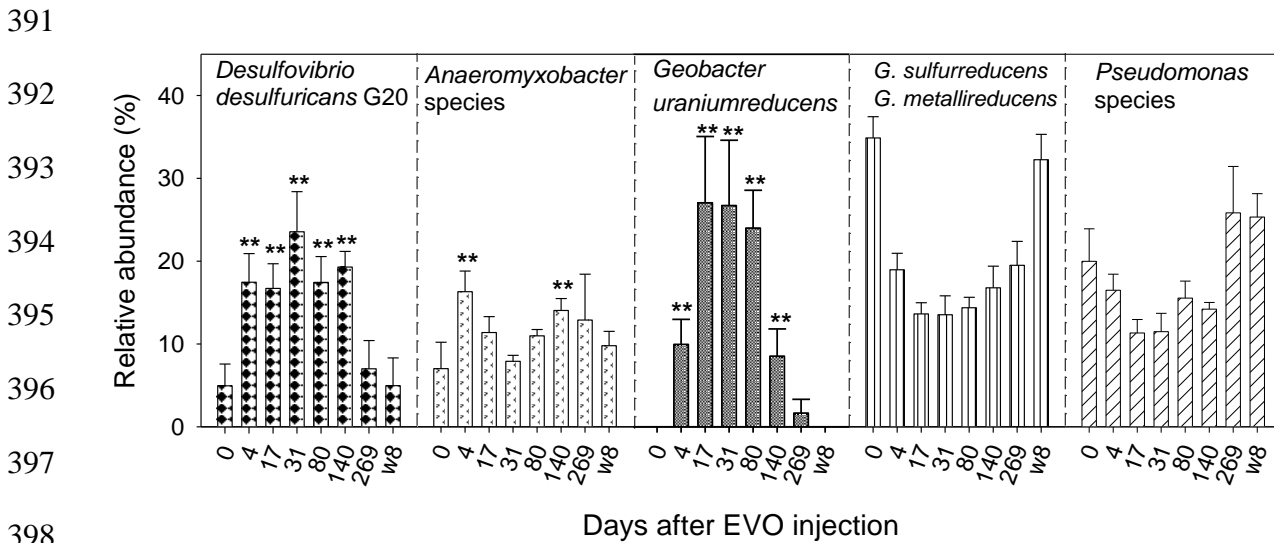

399 **FIG S9** Changes in the average relative abundance of major cytochrome-containing populations  
 400 in the seven downgradient wells after EVO amendment. The significance (\*\* $P < 0.05$ , \* $< 0.10$ )  
 401 was tested between each time point and 0d using the Student's t-test. Data detected at the same  
 402 time points in a upgradient control well (W8) were also included for comparison. All data are  
 403 presented as mean  $\pm$  SE of measurements in the seven downgradient wells (W1-W7) at each time  
 404 point, and mean  $\pm$  SE of seven measurements in W8 over time. The mean signal intensity was  
 405 calculated by dividing the total signal intensity of all genes detected in a species by the number  
 406 of genes from this species, and the relative abundance was calculated by dividing the mean  
 407 signal intensity by the total signal intensity of all cytochrome genes detected. *Anaeromyxobacter*  
 408 spp. include *A. dehalogenans* 2CP-C and *A. sp.* Fw109-5. *Pseudomonas* spp. primarily include *P.*  
 409 *putida* KT2440, *P. stutzeri* A1501, *P. syringae*, *P. fluorescens*, and *P. aeruginosa* PA7.

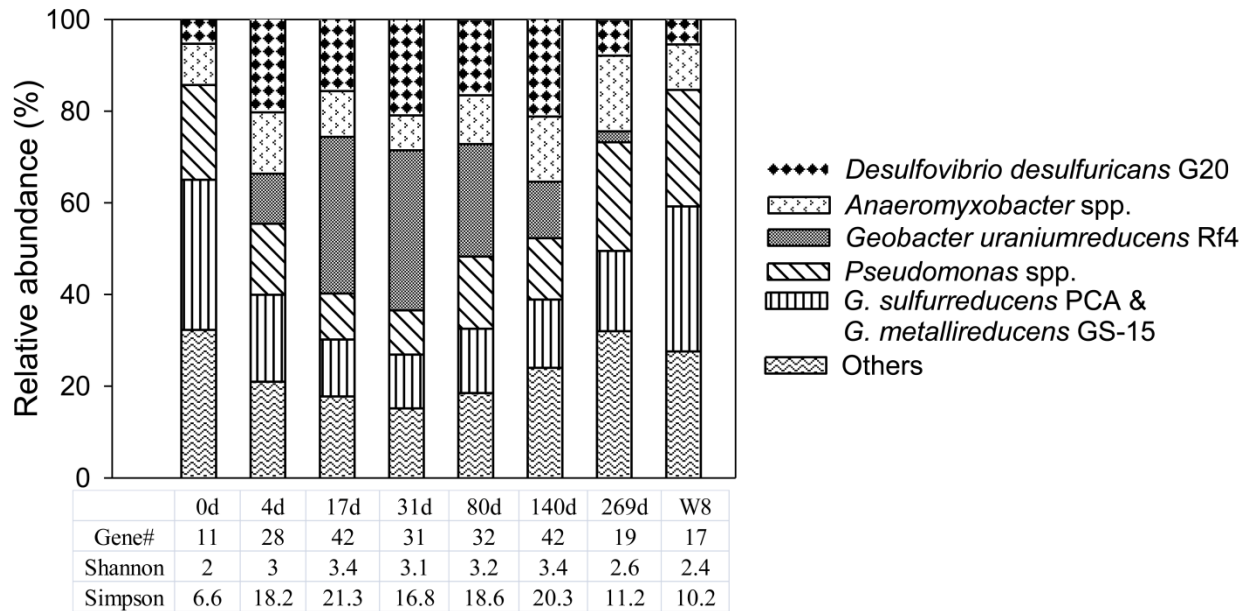

410

411 **FIG S10** Changes in the composition and structure of cytochrome-containing communities in the  
 412 seven downgradient wells after EVO amendment. Data detected at the same time points in an  
 413 upgradient control well (W8) were also included for comparison. The table shows total number  
 414 and Shannon–Weiner ( $H'$ ) and Simpson's ( $1/D$ ) diversity indices of detected cytochrome genes.  
 415 The mean signal intensity was calculated by dividing the total signal intensity of all genes  
 416 detected in a species by the number of genes from this species, and the relative abundance was  
 417 calculated by dividing the mean signal intensity by the total signal intensity of all cytochrome  
 418 genes detected. All data are presented as mean of measurements in the seven downgradient wells  
 419 (W1-W7) at each time point and mean of seven measurements in W8 over time. SE and  $P$  values  
 420 are shown in the Supplemental material Fig S9. *Anaeromyxobacter* spp. include *A. dehalogenans*  
 421 2CP-C and *A. sp.* Fw109-5. *Pseudomonas* spp. primarily include *P. putida* KT2440, *P. stutzeri*  
 422 A1501, *P. syringae*, *P. fluorescens*, and *P. aeruginosa* PA7. Others include *Rhodobacter*,  
 423 *Haloarcula*, *Sinorhizobium*, *Halorubrum*, and *Candida*.

424

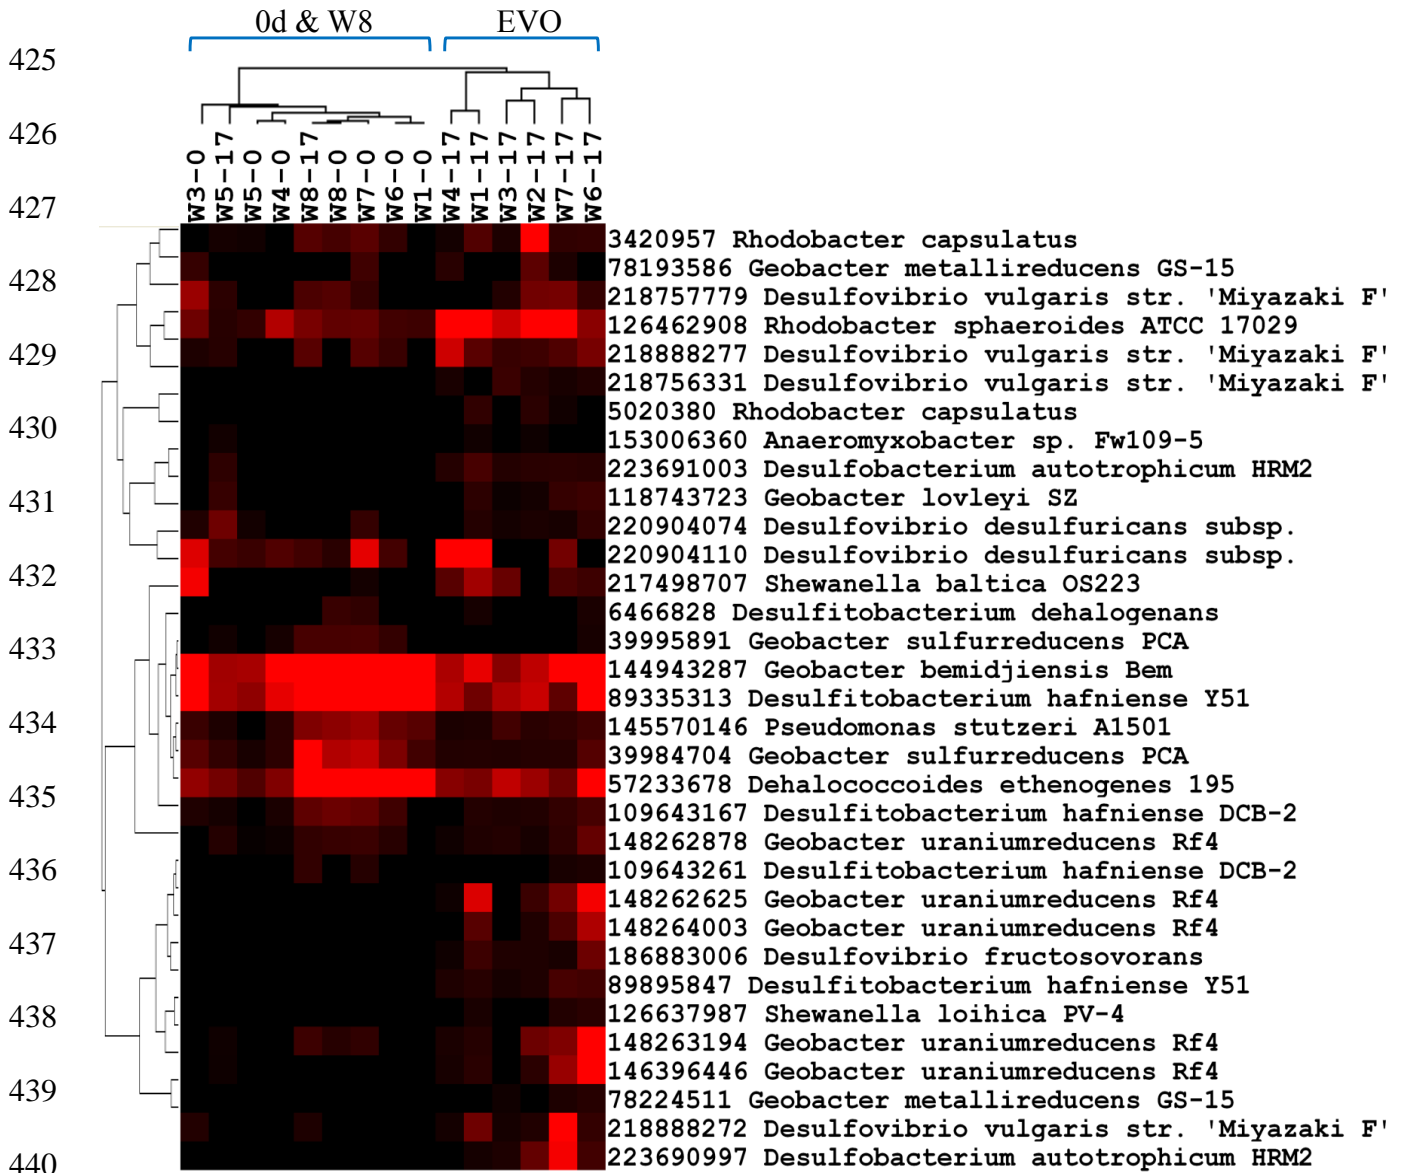

441 **FIG S11** Enrichment of hydrogenase genes in the seven downgradient wells (W1-W7) 17 days  
 442 after EVO amendment. In the sample ID, the number following dash is 0 for Day 0 samples, and  
 443 is 17 for Day 17 samples. Data detected in the control well (W8) at these time points were also  
 444 included. The protein id numbers and derived microorganisms are shown.

445  
 446  
 447

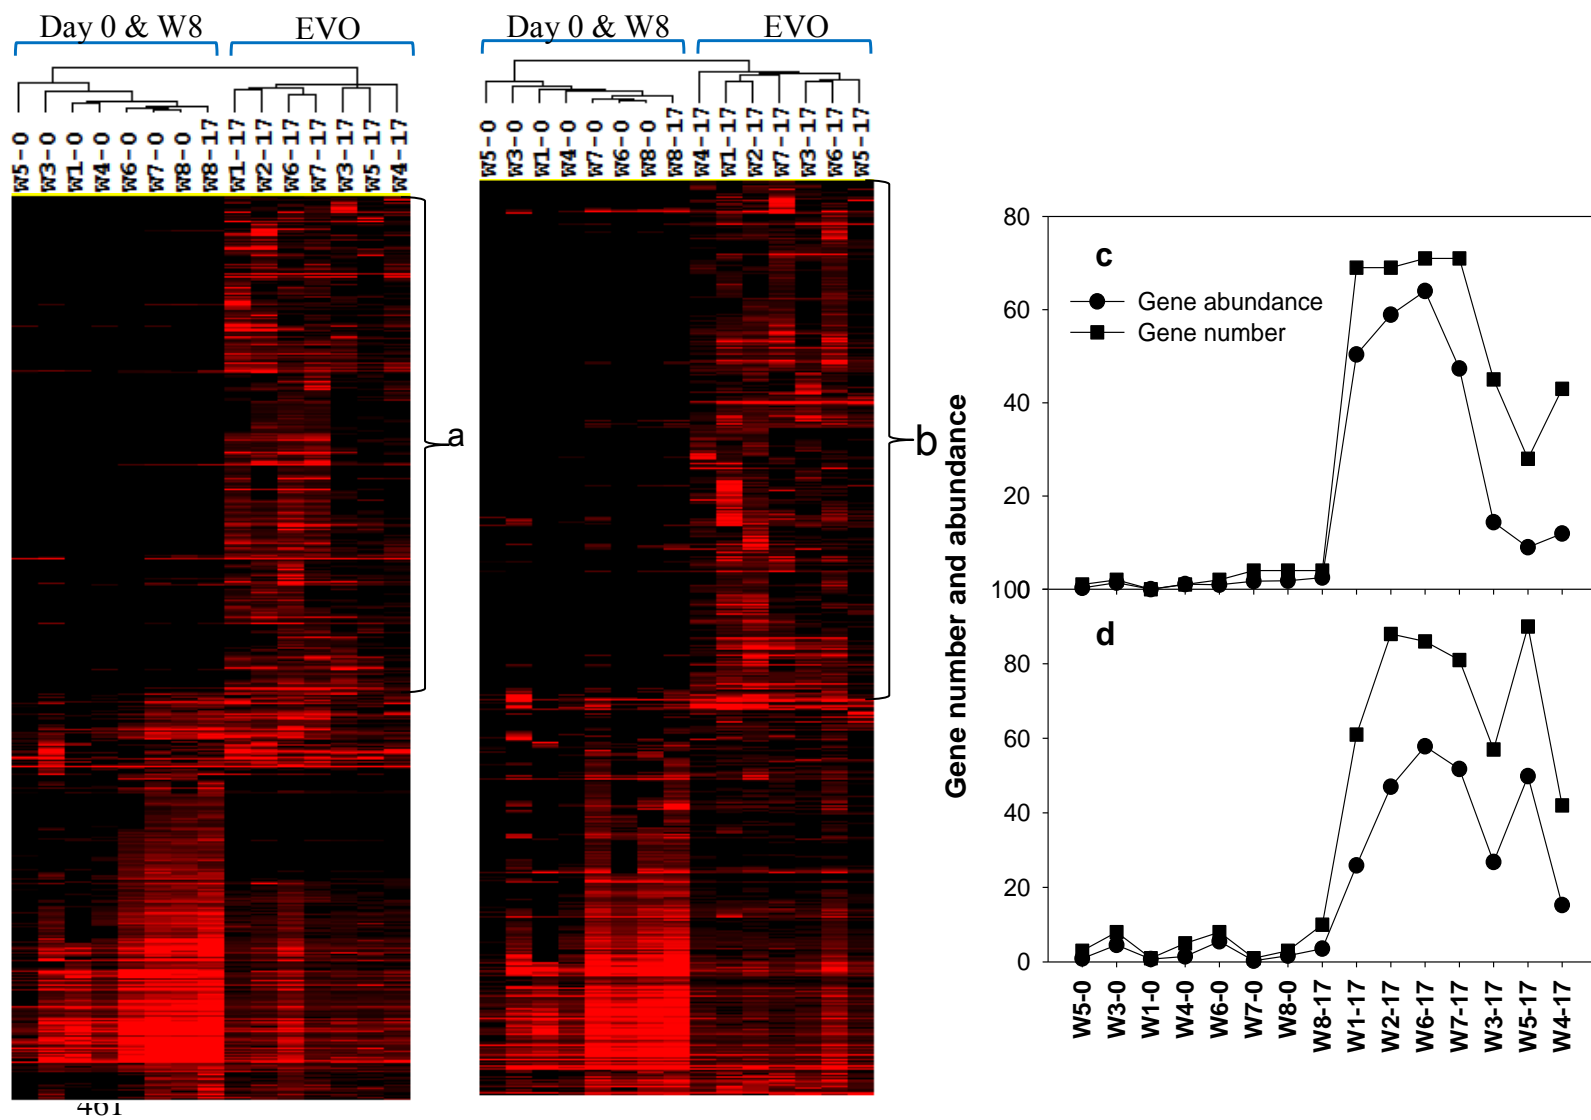

462 **FIG S12** Enrichment of metal resistance (a and c) and organic contaminant degradation (b and d)  
 463 genes in the seven downgradient wells (W1-W7) at 17 days after EVO amendment. In the  
 464 sample ID, the number following dash is 0 for Day 0 samples, and is 17 for Day 17 samples.  
 465 Data detected in the control well (W8) at these time points were also included. Panels a and b  
 466 show more genes were detected after EVO amendment, and panels c and d show increased ( $P <$   
 467 0.001) number and abundance of genes derived from the genera which have species known to be  
 468 capable of U(VI) reduction. These selected genera included *Geobacter*, *Anaeromyxobacter*,  
 469 *Desulfovibrio*, *Desulfitobacterium*, *Desulfotomaculum*, *Acidovorax*, *Pseudomonas*, *Salmonella*,  
 470 *Clostridium*, and *Deinococcus* for metal resistance genes [e.g., efflux transporters for Cr (*ChrA*)

471 and Zn (*czcA/D* and *zntA*)]. For organic contaminant degradation genes (e.g., *toluene*  
 472 *dioxygenase* for trichloroethylene degradation), the selected genera included *Geobacter*,  
 473 *Desulfovibrio*, *Desulfitobacterium*, *Acidovorax*, *Pseudomonas*, *Clostridium*, and *Deinococcus*.

474

475

476 **C. Supplemental Table**

477 **TABLE S1** Significance ( $P < 0.05$ , boldface values) of the effects of EVO amendment on  
 478 overall functional structure of the groundwater microbial community and concentrations of  
 479 acetate and five electron acceptors<sup>a</sup> using three statistical tests<sup>b</sup>

| Difference from 0d             | Microbial community |              |              | Geochemical variables <sup>a</sup> |              |              |
|--------------------------------|---------------------|--------------|--------------|------------------------------------|--------------|--------------|
|                                | MRPP                | ANOSIM       | Adonis       | MRPP                               | ANOSIM       | Adonis       |
| 4d                             | <b>0.001</b>        | <b>0.002</b> | <b>0.001</b> | 0.138                              | 0.150        | 0.100        |
| 17d                            | <b>0.001</b>        | <b>0.001</b> | <b>0.001</b> | <b>0.001</b>                       | <b>0.002</b> | <b>0.001</b> |
| 31d                            | <b>0.025</b>        | <b>0.023</b> | <b>0.017</b> | <b>0.002</b>                       | <b>0.001</b> | <b>0.001</b> |
| 80d                            | <b>0.005</b>        | <b>0.004</b> | <b>0.006</b> | <b>0.005</b>                       | <b>0.007</b> | <b>0.004</b> |
| 140d                           | <b>0.010</b>        | <b>0.007</b> | <b>0.009</b> | <b>0.039</b>                       | <b>0.043</b> | <b>0.034</b> |
| 269d                           | <b>0.003</b>        | <b>0.004</b> | <b>0.004</b> | 0.058                              | <b>0.049</b> | 0.184        |
| 4-17d vs. 80-140d <sup>c</sup> | <b>0.006</b>        | <b>0.002</b> | <b>0.005</b> | 0.192                              | 0.398        | 0.288        |

480 <sup>a</sup>included acetate  $\text{NO}_3^-$ , Fe(II), Mn(II), U(VI), and  $\text{SO}_4^{2-}$ .

481 <sup>b</sup>All three tests are non-parametric multivariate analyses based on dissimilarities between  
 482 samples in different groups using bray-cutis distance. MRPP, multiple response permutation  
 483 procedure, a nonparametric procedure that does not depend on assumptions such as normally  
 484 distributed data or homogeneous variances, but rather depends on the internal variability of the  
 485 data; ANOSIM, analysis of similarity; Adonis, non-parametric multivariate analysis of variance  
 486 (MANOVA) with the adonis function. The difference is significant when at least two tests gave  
 487  $P$  values of  $< 0.05$ .

488 <sup>c</sup>Difference between two groups.



489

490 **D. Supplemental references**

- 491 1. **Ahn, S. J., J. Costa, and J. R. Emanuel.** 1996. PicoGreen quantitation of DNA: Effective  
492 evaluation of samples pre- or post-PCR. *Nucleic Acids Res* **24**:2623-2625.
- 493 2. **Anderson, M. J.** 2001. A new method for non-parametric multivariate analysis of variance.  
494 *Austral Ecol* **26**:32-46.
- 495 3. **Borcard, D., P. Legendre, and P. Drapeau.** 1992. Partialling out the Spatial Component of  
496 Ecological Variation. *Ecology* **73**:1045-1055.
- 497 4. **Borden, R. C.** 2007. Effective distribution of emulsified edible oil for enhanced anaerobic  
498 bioremediation. *J Contam Hydrol* **94**:1-12.
- 499 5. **Clarke, K. R.** 1993. Nonparametric Multivariate Analyses of Changes in Community  
500 Structure. *Aust J Ecol* **18**:117-143.
- 501 6. **de Hoon, M. J. L., S. Imoto, J. Nolan, and S. Miyano.** 2004. Open source clustering  
502 software. *Bioinformatics* **20**:1453-1454.
- 503 7. **Gihring, T. M., G. X. Zhang, C. C. Brandt, S. C. Brooks, J. H. Campbell, S. Carroll, C.**  
504 **S. Criddle, S. J. Green, P. Jardine, J. E. Kostka, K. Lowe, T. L. Mehlhorn, W. Overholt,**  
505 **D. B. Watson, Z. M. Yang, W. M. Wu, and C. W. Schadt.** 2011. A Limited Microbial  
506 Consortium Is Responsible for Extended Bioreduction of Uranium in a Contaminated  
507 Aquifer. *Appl Environ Microb* **77**:5955-5965.
- 508 8. **He, Z. L., M. Y. Xu, Y. Deng, S. H. Kang, L. Kellogg, L. Y. Wu, J. D. Van Nostrand, S.**  
509 **E. Hobbie, P. B. Reich, and J. Z. Zhou.** 2010. Metagenomic analysis reveals a marked  
510 divergence in the structure of belowground microbial communities at elevated CO<sub>2</sub>. *Ecol*  
511 *Lett* **13**:564-575.

- 512 9. **He, Z. L., and J. Z. Zhou.** 2008. Empirical evaluation of a new method for calculating  
513 signal-to-noise ratio for microarray data analysis. *Appl Environ Microb* **74**:2957-2966.
- 514 10. **Kelly, S. D., K. M. Kemner, J. Carley, C. Criddle, P. M. Jardine, T. L. Marsh, D.**  
515 **Phillips, D. Watson, and W. M. Wu.** 2008. Speciation of uranium in sediments before and  
516 after in situ biostimulation. *Environ Sci Technol* **42**:1558-1564.
- 517 11. **Liang, Y., Z. He, L. Wu, Y. Deng, G. Li, and J. Zhou.** 2010. Development of a common  
518 oligonucleotide reference standard for microarray data normalization and comparison across  
519 different microbial communities. *Appl Environ Microb* **76**:1088-1094.
- 520 12. **Liang, Y. T., Z. L. He, L. Y. Wu, Y. Deng, G. H. Li, and J. Z. Zhou.** 2010. Development  
521 of a Common Oligonucleotide Reference Standard for Microarray Data Normalization and  
522 Comparison across Different Microbial Communities. *Appl Environ Microb* **76**:1088-1094.
- 523 13. **Lu, Z., Y. Deng, J. D. Van Nostrand, Z. He, J. Voordeckers, A. Zhou, Y. J. Lee, O. U.**  
524 **Mason, E. A. Dubinsky, K. L. Chavarria, L. M. Tom, J. L. Fortney, R. Lamendella, J.**  
525 **K. Jansson, P. D'Haeseleer, T. C. Hazen, and J. Zhou.** 2011. Microbial gene functions  
526 enriched in the Deepwater Horizon deep-sea oil plume. *The ISME journal*.
- 527 14. **Moon, J. W., Y. Roh, T. J. Phelps, D. H. Phillips, D. B. Watson, Y. J. Kim, and S. C.**  
528 **Brooks.** 2006. Physicochemical and mineralogical characterization of soil-saprolite cores  
529 from a field research site, Tennessee. *J Environ Qual* **35**:1731-1741.
- 530 15. **Van Nostrand, J. D., L. Wu, W. M. Wu, Z. Huang, T. J. Gentry, Y. Deng, J. Carley, S.**  
531 **Carroll, Z. He, B. Gu, J. Luo, C. S. Criddle, D. B. Watson, P. M. Jardine, T. L. Marsh,**  
532 **J. M. Tiedje, T. C. Hazen, and J. Zhou.** 2011. Dynamics of Microbial Community  
533 Composition and Function during In Situ Bioremediation of a Uranium-Contaminated  
534 Aquifer. *Appl Environ Microbiol* **77**:3860-3869.

- 535 16. **Wu, L., X. Liu, C. W. Schadt, and J. Zhou.** 2006. Microarray-based analysis of  
536 subnanogram quantities of microbial community DNAs by using whole-community genome  
537 amplification. *Appl Environ Microbiol* **72**:4931-4941.
- 538 17. **Wu, W. M., J. Carley, S. J. Green, J. Luo, S. D. Kelly, J. Van Nostrand, K. Lowe, T.**  
539 **Mehlhorn, S. Carroll, B. Boonchayanant, F. E. Lofler, D. Watson, K. M. Kemner, J. Z.**  
540 **Zhou, P. K. Kitanidis, J. E. Kostka, P. M. Jardine, and C. S. Criddle.** 2010. Effects of  
541 Nitrate on the Stability of Uranium in a Bioreduced Region of the Subsurface. *Environ Sci*  
542 *Technol* **44**:5104-5111.
- 543 18. **Wu, W. M., J. Carley, J. Luo, M. A. Ginder-Vogel, E. Cardenas, M. B. Leigh, C. C.**  
544 **Hwang, S. D. Kelly, C. M. Ruan, L. Y. Wu, J. Van Nostrand, T. Gentry, K. Lowe, T.**  
545 **Mehlhorn, S. Carroll, W. S. Luo, M. W. Fields, B. H. Gu, D. Watson, K. M. Kemner, T.**  
546 **Marsh, J. Tiedje, J. Z. Zhou, S. Fendorf, P. K. Kitanidis, P. M. Jardine, and C. S.**  
547 **Criddle.** 2007. In situ bioreduction of uranium (VI) to submicromolar levels and reoxidation  
548 by dissolved oxygen. *Environ Sci Technol* **41**:5716-5723.
- 549 19. **Zhou, J., S. Kang, C. W. Schadt, and C. T. Garten, Jr.** 2008. Spatial scaling of functional  
550 gene diversity across various microbial taxa. *P Natl Acad Sci USA* **105**:7768-7773.
- 551 20. **Zhou, J. Z., M. A. Bruns, and J. M. Tiedje.** 1996. DNA recovery from soils of diverse  
552 composition. *Appl Environ Microb* **62**:316-322.

553

554
